# Supplementary material for: Crystal Structure of the Japanese Encephalitis Virus Capsid Protein
Source: PubMed Central journal article supplement (PMC6669762; doi:10.3390/v11070623), 2019-07-06
Supplement: viruses-11-00623-s001.pdf [file viruses-11-00623-s001.pdf]

Supplementary Materials

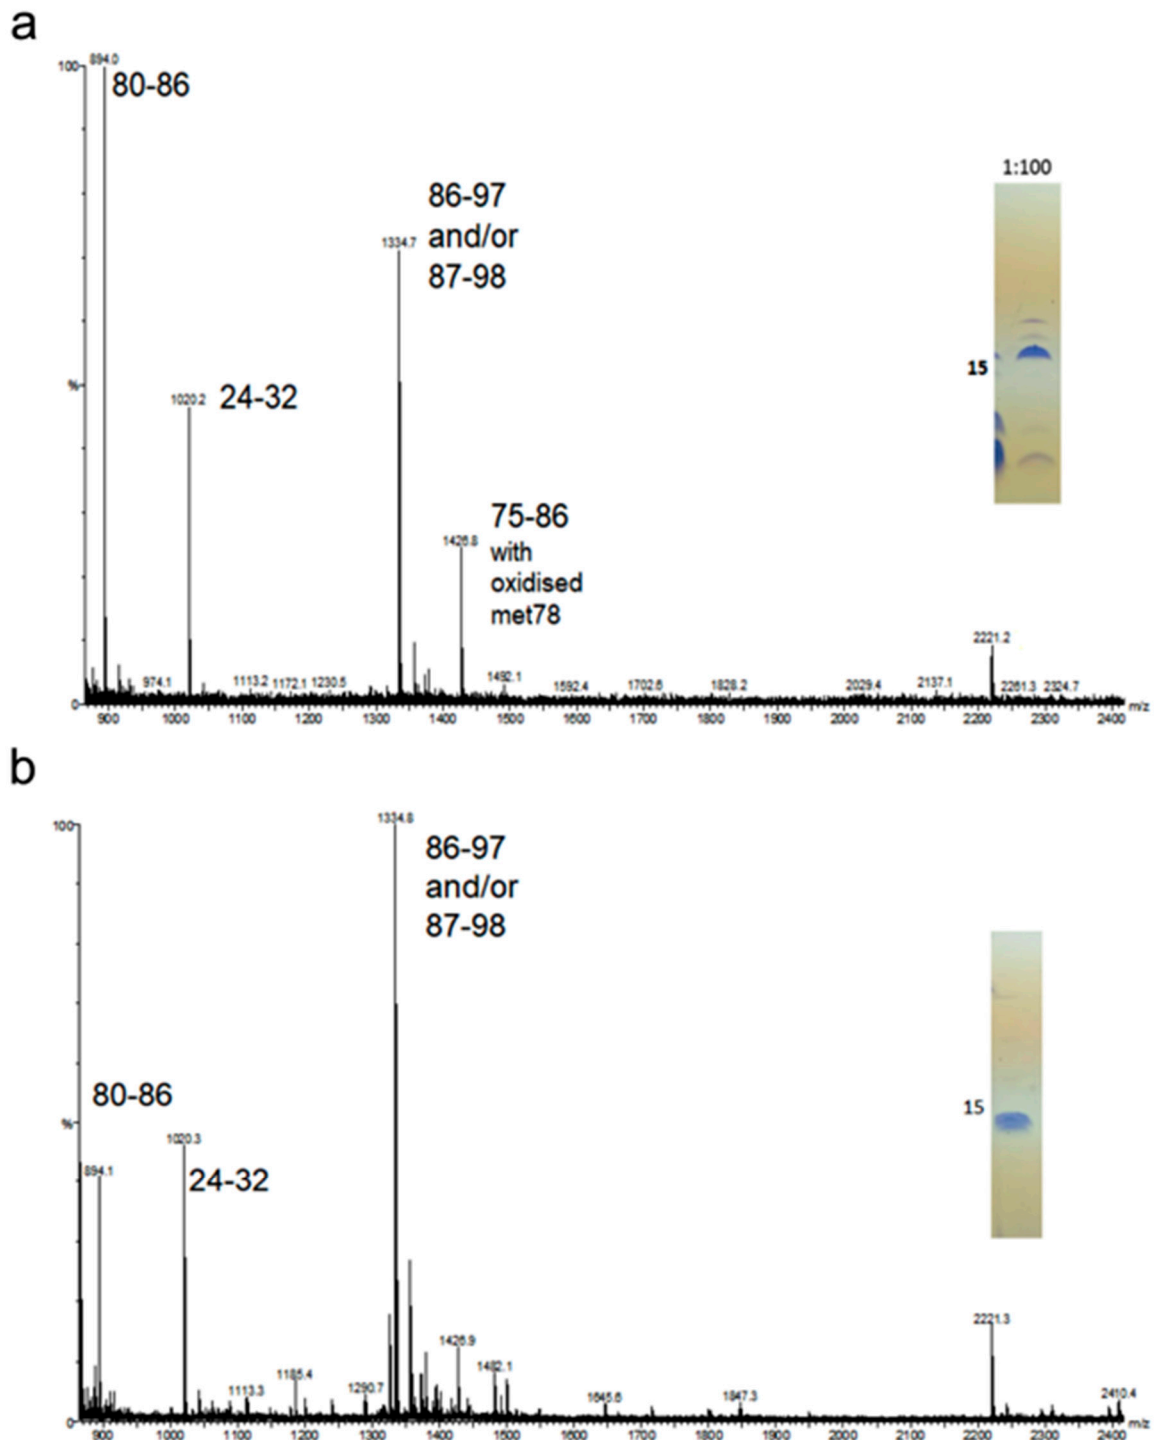

**Figure S1.** Mass-spectrometry analysis of JEV capsid protein. MS analysis of digested (a) and purified capsid (b). SDS-PAGE gels of the samples used for MS analysis are shown. Residue numbers are indicated next to the peaks.

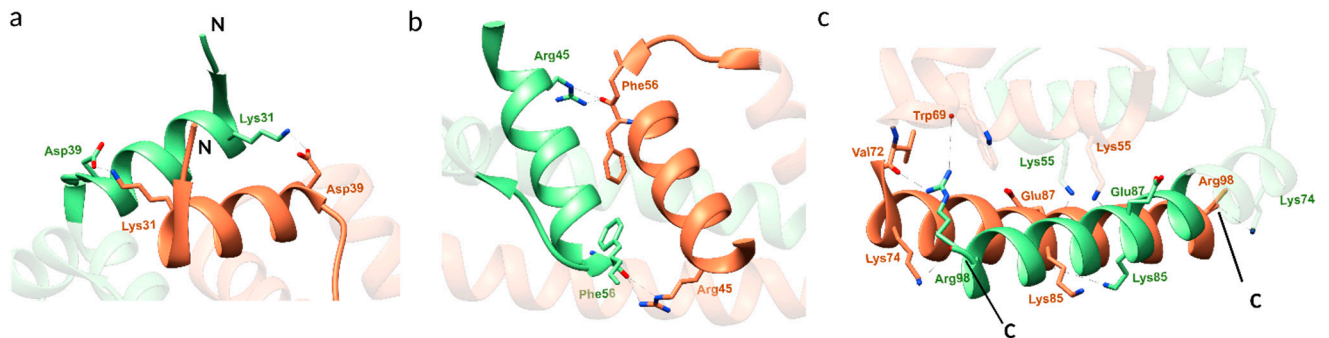

**Figure S2.** Hydrogen bonds at the JEV capsid dimer interface. Hydrogen bonds at the  $\alpha 1$ - $\alpha 1'$ ,  $\alpha 2$ - $\alpha 2'$ , and  $\alpha 3$ - $\alpha 3'$  are shown with dashed lines in figure (a), (b), and (c), respectively. One monomer is in orange. Another is in green.

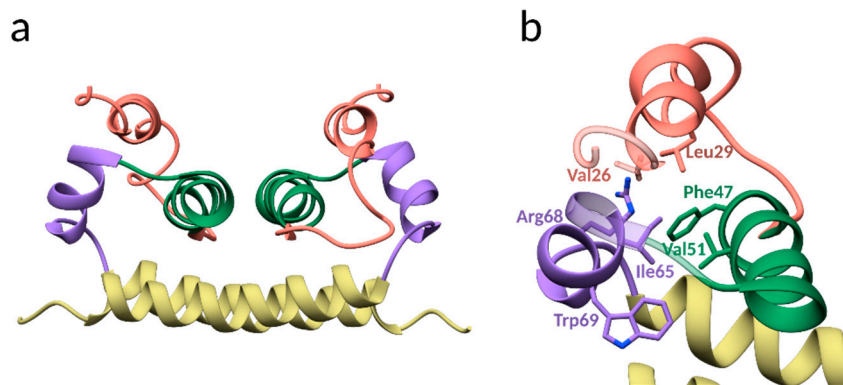

**Figure S3.** DENV capsid  $\alpha 1$ - $\alpha 3$  bundle. Residues involve in side chain packing of DENV (PDB: 1R6R) capsid  $\alpha 1$ - $\alpha 3$  bundle are labeled. Each monomer coloured by the 1-4  $\alpha$  helices in orange, green, purple, and yellow, respectively.

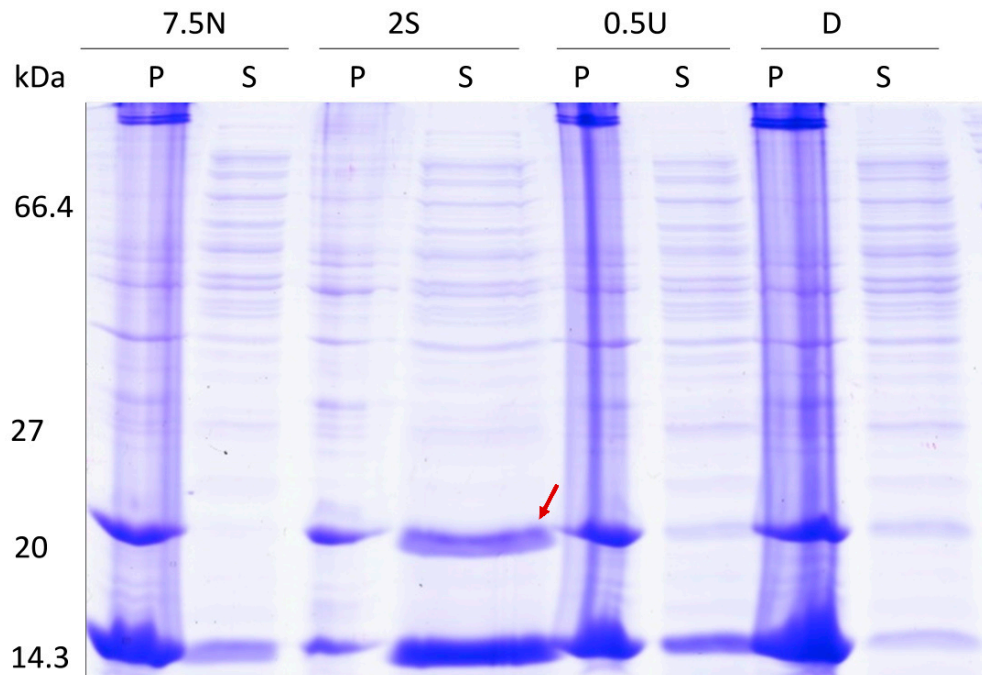

**Figure S4.** JEV capsid protein lysis buffer screening. Lysis buffer screening demonstrated that capsid protein is soluble in 2 M salt buffer indicating by red arrow and partially soluble in buffer containing urea and detergent. Pellet fractions and suspension fractions were labelled P and S, respectively. Four lysis buffers were the buffer added with the following additives: no additive (7.5N), 2 M NaCl (2S), 0.5 M urea (0.5U), and 0.2% Triton X 100 (D).

**Table S1.** Data collection and refinement statistics.

| <b>JEV Capsid</b>                                   |                        |
|-----------------------------------------------------|------------------------|
| <b>Data Collection</b>                              |                        |
| Space group                                         | P212121                |
| Cell dimensions                                     |                        |
| <i>a, b, c</i> (Å)                                  | 46.31, 49.78, 68.25    |
| $\alpha, \beta, \gamma$ (°)                         | 90, 90, 90             |
| Resolution (Å)                                      | 38.32-1.98(2.03-1.98)* |
| <i>R</i> <sub>merge</sub>                           | 0.058(0.862)           |
| <i>R</i> <sub>pim</sub>                             | 0.044(0.686)           |
| <i>I</i> / $\sigma$ <i>I</i>                        | 12.1(1.4)              |
| CC half                                             | 0.999(0.551)           |
| Completeness (%)                                    | 99.6(99)               |
| Redundancy                                          | 4.5(4.3)               |
| <b>Refinement</b>                                   |                        |
| Resolution (Å)                                      | 38.32-1.98             |
| No. reflections                                     | 10871                  |
| <i>R</i> <sub>work</sub> / <i>R</i> <sub>free</sub> | 0.188/0.237            |
| No. atoms                                           | 1229                   |
| Protein                                             | 1144                   |
| Water                                               | 56                     |
| Ethylene glycol                                     | 16                     |
| Citrate ion                                         | 13                     |
| <i>B</i> -factors                                   |                        |
| Protein                                             | 42.77                  |
| Water                                               | 53.26                  |
| Ethylene glycol                                     | 52.91                  |
| 2-propanol                                          | -                      |
| Citrate ion                                         | 66.22                  |
| R.m.s. deviations                                   |                        |
| Bond lengths (Å)                                    | 0.014                  |
| Bond angles (°)                                     | 1.428                  |

**Table S2.** Hydrogen bonds between JEV capsid dimer interfacing residues and the distance.

| Number | Structure 1  | Distance (Å) <sup>1</sup> | Structure 2               |
|--------|--------------|---------------------------|---------------------------|
| 1      | Lys 31 [NZ]  | 2.64                      | Asp 39 [OD1] <sup>2</sup> |
| 2      | Arg 45 [NE]  | 3.11                      | Phe 56 [O]                |
| 3      | Arg 45 [NH2] | 3.13                      | Phe 56 [O]                |
| 4      | Arg 98 [NH2] | 3.36                      | Trp 69 [O]                |
| 5      | Arg 98 [NH1] | 2.94                      | Val 72 [O]                |
| 6      | Lys 85 [NZ]  | 3.87                      | Lys 85 [O]                |
| 7      | Lys 55 [NZ]  | 3.03                      | Glu 87 [O]                |
| 8      | Lys 74 [NZ]  | 2.77                      | Arg 98 [O]                |
| 9      | Asp 39 [OD1] | 2.69                      | Lys 31 [NZ]               |
| 10     | Phe 56 [O]   | 3.16                      | Arg 45 [NH2]              |
| 11     | Phe 56 [O]   | 3.07                      | Arg 45 [NE]               |
| 12     | Glu 87 [O]   | 3.00                      | Lys 55 [NZ]               |
| 13     | Arg 98 [O]   | 2.98                      | Lys 74 [NZ]               |

<sup>1</sup> Assembly analysis in the program PISA [50].

**Table S3.** Salt bridges between JEV capsid dimer interfacing residues.

| Number | Structure 1  | Distance (Å) <sup>1</sup> | Structure 2  |
|--------|--------------|---------------------------|--------------|
| 1      | Lys 31 [NZ]  | 2.64                      | Asp 39 [OD1] |
| 2      | Lys 74 [NZ]  | 2.77                      | Arg 98 [O]   |
| 3      | Asp 39 [OD1] | 2.69                      | Lys 31 [NZ]  |
| 4      | Arg 98 [O]   | 2.98                      | Lys 74 [NZ]  |

<sup>1</sup> Assembly analysis in the program PISA.

**Table S4.** JEV capsid dimer interfacing residues reported with accessible (ASA) and buried surface area (BSA), solvation energy effect ( $\Delta G$ ) and conservation score.

(The values are reported from one monomer)

| Number | Residue | ASA ( $\text{\AA}^2$ ) | BSA ( $\text{\AA}^2$ ) | $\Delta G$ (kcal/mol) | Conservation <sup>1</sup> |
|--------|---------|------------------------|------------------------|-----------------------|---------------------------|
| 1      | Leu27   | 83.65                  | 21.41                  | 0.34                  | 1                         |
| 2      | Val30   | 117.35                 | 93.60                  | 1.5                   | 2*                        |
| 3      | Lys31   | 144.46                 | 90.81                  | 0.19                  | 8                         |
| 4      | Val33   | 69.18                  | 18.08                  | 0.29                  | 3*                        |
| 5      | Val34   | 64.36                  | 56.65                  | 0.91                  | 6*                        |
| 6      | Met35   | 100.45                 | 54.43                  | 1.29                  | 1                         |
| 7      | Leu37   | 10.72                  | 9.71                   | 0.16                  | 5*                        |
| 8      | Leu38   | 49.69                  | 37.96                  | 0.59                  | 3*                        |
| 9      | Asp39   | 74.39                  | 20.45                  | -0.36                 | 2*                        |
| 10     | Arg45   | 84.22                  | 18.52                  | -0.08                 | 6*                        |
| 11     | Phe46   | 93.98                  | 43.04                  | 0.67                  | 2*                        |
| 12     | Ala49   | 41.95                  | 41.95                  | 0.56                  | 7                         |
| 13     | Leu50   | 24.80                  | 24.80                  | 0.38                  | 2*                        |
| 14     | Ile51   | 19.52                  | 7.19                   | 0.12                  | 5*                        |
| 15     | Thr52   | 28.95                  | 28.56                  | 0.17                  | 5*                        |
| 16     | Phe53   | 92.37                  | 91.73                  | 1.47                  | 7*                        |
| 17     | Phe54   | 22.78                  | 16.86                  | 0.27                  | 5*                        |
| 18     | Lys55   | 164.75                 | 92.62                  | -1.11                 | 7*                        |
| 19     | Phe56   | 146.69                 | 144.04                 | 1.49                  | 6*                        |
| 20     | Thr57   | 60.84                  | 42.49                  | 0.44                  | 6*                        |
| 21     | Leu59   | 102.50                 | 49.22                  | 0.79                  | 7*                        |
| 22     | Ala60   | 89.25                  | 18.81                  | -0.10                 | 5*                        |
| 23     | Thr62   | 52.30                  | 27.04                  | 0.43                  | 8                         |
| 24     | Trp69   | 87.57                  | 51.05                  | 0.60                  | 8                         |
| 25     | Lys70   | 155.76                 | 6.41                   | 0.02                  |                           |
| 26     | Lys72   | 25.04                  | 11.51                  | -0.11                 |                           |
| 27     | Lys74   | 158.12                 | 83.67                  | -0.29                 | 6*                        |
| 28     | Ala77   | 16.40                  | 16.40                  | 0.26                  | 9                         |
| 29     | Met78   | 106.53                 | 38.83                  | 0.97                  | 7*                        |
| 30     | Leu81   | 56.97                  | 56.80                  | 0.77                  | 8                         |
| 31     | Thr82   | 69.35                  | 21.75                  | 0.35                  | 2*                        |
| 32     | Phe84   | 36.14                  | 36.14                  | 0.51                  | 7*                        |
| 33     | Lys85   | 156.49                 | 85.08                  | -0.30                 | 7                         |
| 34     | Glu87   | 97.01                  | 47.74                  | 0.13                  | 6*                        |
| 35     | Leu88   | 79.21                  | 79.04                  | 1.24                  | 7                         |
| 36     | Gly89   | 30.81                  | 14.57                  | 0.21                  | 5*                        |
| 37     | Thr90   | 93.35                  | 9.88                   | 0.16                  | 4*                        |
| 38     | Leu91   | 108.63                 | 90.54                  | 1.44                  | 7                         |
| 39     | Ile92   | 91.95                  | 74.87                  | 1.19                  | 6*                        |
| 40     | Val95   | 102.29                 | 87.78                  | 1.23                  | 4*                        |
| 41     | Asn96   | 114.80                 | 45.24                  | -0.49                 | 8                         |
| 42     | Lys97   | 165.54                 | 0.48                   | 0.01                  | 3*                        |
| 43     | Arg98   | 130.94                 | 29.07                  | 0.03                  | 9                         |

<sup>1</sup> Amino acid conservation scores are given by ConSurf. [51] (9 = conserved and 1 = variable) The following UniProtKB were submitted for conservation score calculation: W0LHC1, A0A1B2CW17, A0A0A7AAT7, W0LLY6, Q32ZE1, P12823, P14335, Q89277, P07720, and P27395.

- Below the confidence cut-off [51].

- **References**

- 

- 50. Krissinel, E.; Henrick, K. Inference of macromolecular assemblies from crystalline state. *J. Mol. Biol.* **2007**, *372*, 774–797. doi:10.1016/j.jmb.2007.05.022.
- 51. Landau, M.; Mayrose, I.; Rosenberg, Y.; Glaser, F.; Martz, E.; Pupko, T.; Ben-Tal, N. ConSurf 2005: the projection of evolutionary conservation scores of residues on protein structures. *Nucleic Acids Res.* **2005**, *33*, W299-302. doi:10.1093/nar/gki370.
